# Supplementary material
Source: PubMed Central journal article supplement (PMC1890477)

**A**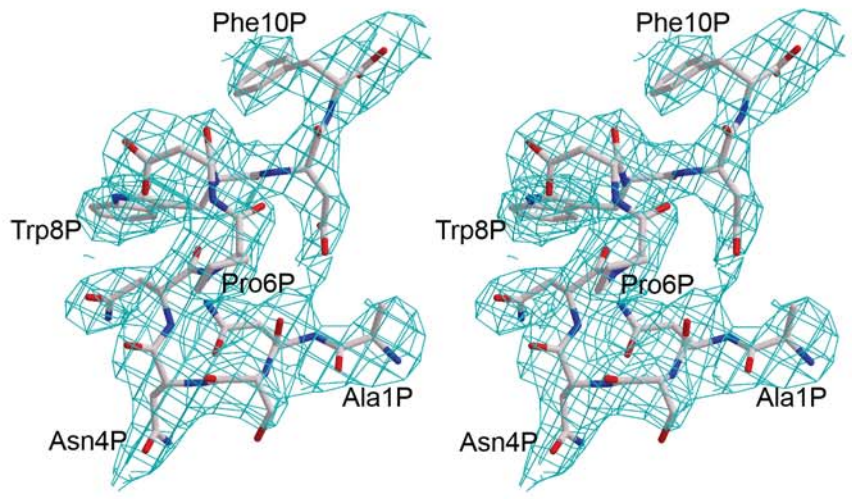**B**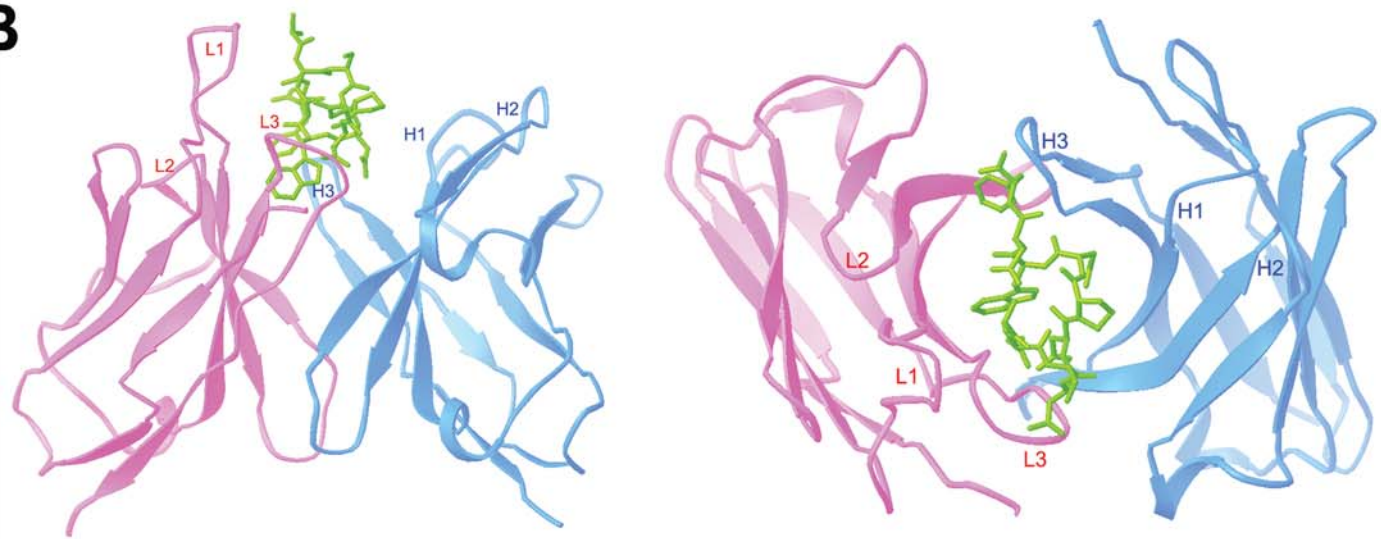

Supplement: pnas_0701279104_1.pdf [file pnas_0701279104_1.pdf]

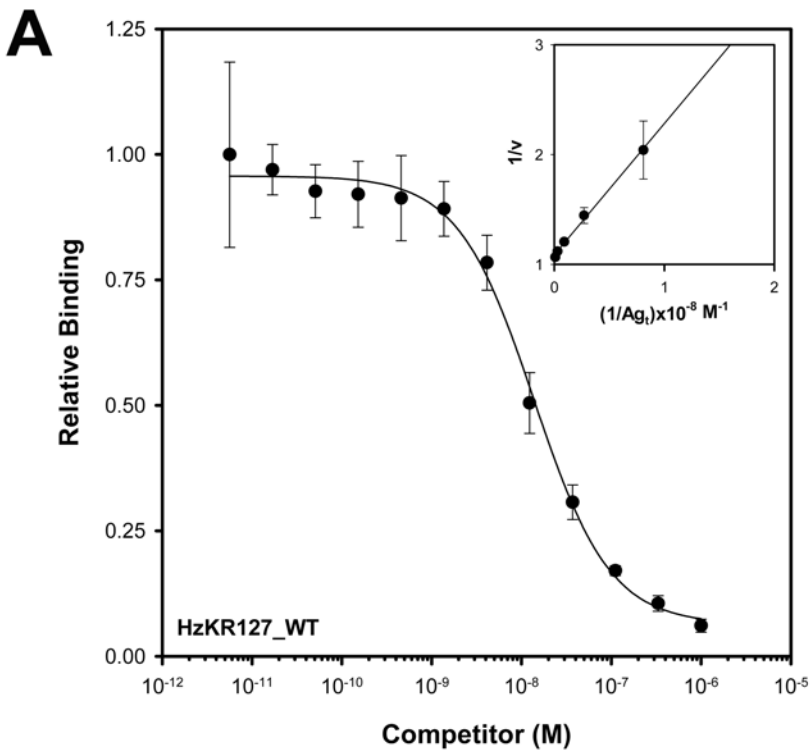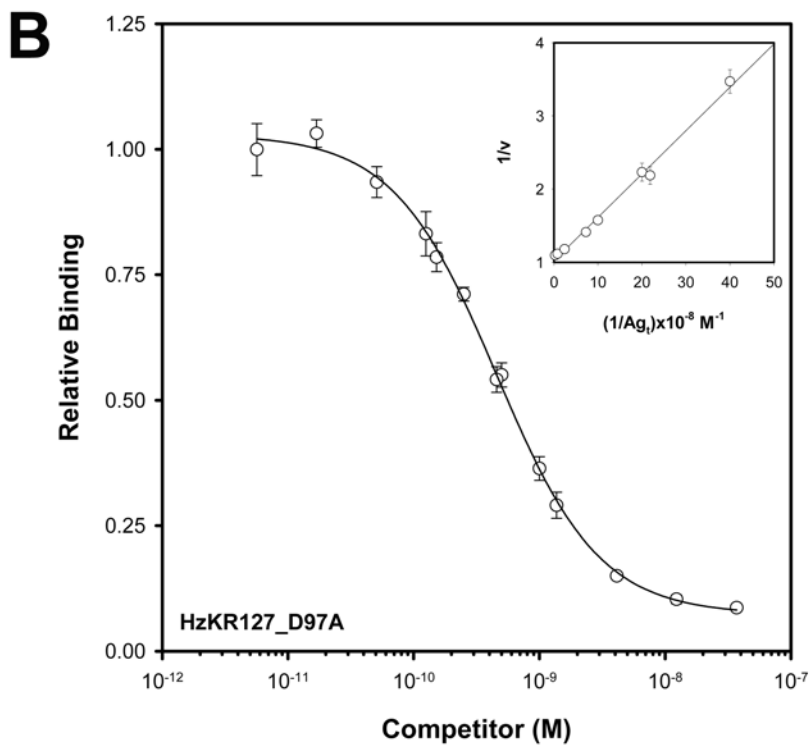

Supplement: pnas_0701279104_2.pdf [file pnas_0701279104_2.pdf]
